# Supplementary material for: Map-based Cloning and Characterization of a Brown Planthopper Resistance Gene BPH26 from Oryza sativa L. ssp. indica Cultivar ADR52
Source: PubMed Central journal article supplement — Sci Rep. 2014 Jul 29;4:5872. doi: 10.1038/srep05872 (PMC5376202; doi:10.1038/srep05872), 2014-07-29
Supplement: srep05872-s1.pdf [file srep05872-s1.pdf]

Supplementary Information File

**Map-based Cloning and Characterization of a Brown Planthopper**

**Resistance Gene *BPH26* from *Oryza sativa* L. ssp. *indica* Cultivar ADR52**

Yasumori Tamura<sup>1\*</sup>, Makoto Hattori<sup>1</sup>, Hirofumi Yoshioka<sup>2</sup>, Miki Yoshioka<sup>2</sup>, Akira Takahashi<sup>3</sup>, Jianzhong Wu<sup>4</sup>, Naoki Sentoku<sup>5</sup> and Hideshi Yasui<sup>6\*</sup>

\*To whom correspondence should be addressed.

E-mail: Yasumori Tamura: yasumori@affrc.go.jp

Hideshi Yasui: hyasui@agr.kyushu-u.ac.jp

This PDF file includes:

Supplementary Figures S1–S7

Supplementary Tables S1-S2

**a**

ATGGAGGCCACGGCGGTGAGCATTGGCAGGTCCGTGCTGAAGGGAGCGCTTGGCTTCGCCAAATCCACCTTGGTGGAGGAGGTTCCCTGCAGCTCGCGCTCCAGCGTGACCAGCGTTCA  
TCAGGGACGAGCTGGAGATGATGAACCTCCTCTGATGGCCGCAATGATGAGAAAGATGACAACAAGGTGGTAAGGACCTGGTGAAGCAGGTCCGCGACGTGGCCTACGCGTTGAGGA  
CTGCCTCCAGGACTTCGCGCTCCGCTTGGGGGGGAAAGTTCAACCTGGTGGCTCAGCCCTCACACGCTGTGGGAGCGGCGCCGCATCGCCAAGCAGATGAAGGAGCTGAGGGGCAAGGTT  
GAGGATGTCAGCCAGGAAACATGCGCTATCAACTCATCAAGGGCTCCAAGCCTACTGTAGCTACCAATGTCACACCAGCAGCACTGCCCGTGCACCATGTCTGGCGCGCATGAAGAAC  
GGTGGCAGCATGAGAAGGCAATAGATCATCTGGTTCGGCTGGTCAAACCAAAAGTCGATGAACGTAGAGTGATCGCGTGTGGGGAACAAGTGGTGATATCAGGGAATGTCCATCGTTGG  
AGGGCCTATGATCATCTCAAGAGAAACAAGTTTGGTGTATGCTGGGTTAATTTGATGCATCCTGAACCCAACAAGCTCCTGCAAACCATTTGTTAGGCAATTCATGTAAGA  
TCTCTTCAGGAGGCTGGCAAAGCAACTCCGCTGTCAAATTCGAGTAGCATGTTGATAAAGGAAGATCAGGGTTGGGGTTTAGGGTTCTGAGGAGCATGCTGATGAAGGAAGATCATT  
TGAATGATGAGTCAATAAATTTGAGTGACAAGTGCTACCTCATTGTCTTAATGACCTATCGACCCTGAAGAGTGAAGCAAAATAAAATGCTCTTCCCAGACAACAAGAAAGGAAAG  
CCGAATCATAGTGTTCACACAACAAGTTGAAGTTGCAAGCTTTTGCCTAGGACAGGAGGTTGGACCCGAGCAGCATGCGATTGTTTGTGATCAGACTCTTATGCTTTTCACTGCAAG  
GTAATACTAAAAAAAATCCTCAACATGCACTGAAAAAGAAATATTCTATATATCATCATCCATTGAAAGCATACTCTTCTCAACTTGTCTGTAATTAATCAATGTTTTAGCT  
ATGACATTATGTACACAATAAATAACACTAATTAATACCACATAGCTGTCTTTCATCTCTAAGAGCATCTCCAACAACATATATCGTACTCTGTAGTTATAATTAGCAATT  
CTCTTAAAAAATAACAGCTCCAATAAATCACCTATCTTAGTCCCTAAATTTTAGTCCCTCCCATAGTGAGTATAATCGACCCAAATTTGGGTGCCCTGTCCACTCCCTATGCC  
AGCCAAGACTCGCTGATCGTATCGTTTTCCATGCATCCTCCACCTTCCCTCCTCCACATCCCTCGTCTTGGCTTGGCCTTGGCCTTCCGCTCCTGCGACCCACTTAGCTGGCCAT  
TGCTCTTCCACATCAGGCTCCAACCTCTGTGAAAGCATATTTCAATTTGATGTTGGAACGACAACCTATCTTAAACTTACTGCTTAAAGCCAACAATTTGTAAGCTATATAGGAC  
AACATGCCAGCTTAGGCACTGCTAAGCTGTGATTAATTTGCTTGTGTTTTAGTATTATGCAATACGGTAGTACTTTGAGCTCAACTTAACTTATCCTGCATAACACATTTTAGAG  
GATTTTGAAGTTCACAAATGTGATAGATAGATGCAATTTGCACTTATCGAAAATCCCATATGGATACTTGATTTATGTAATAATCAGGACCCCAACAATTTACAGATTGATAAGTC  
TTTTAATGATCGGCAAGTACTATATGGAGTAACTTATGGGTGCAAGGCAATTTAAAAATTAAGTAGTCAATTGAGATTGCTTTTCACTAAAGAATGGTAACCCATTTATACATTT  
ACAAGAGATTTGCTTGGGAAACAAGTAAGTATTATCATAGGAAAGTAGACAATTAGACATCATCATTAATTTCTAAATAAATAACTGTTCTGAAGCAGTTGGCTACAATTTGTTGTTGT  
TGTTTCATTGAAAAGTCTTGAACCTTTTTTTTTTTCATTAAAGGCGATGATGATTCCTTTTAACTCTCGTCTGCTTAAAAATATAATGGTGCACACCTCATGCGTGTAAAGAAA  
GAATATTGTTGATAATCATTTTTTTTGTGTGTGCAAGGTCTAAAGATGGAGTAGATCAATGGAGACTCATCTAACTTAAACGAAGCACTACATACAACGCTGTAGAAGGAAAGAG  
CCTCACTCGCACATTTCAATGGTAACTGCTTCAAGGAATCTGAGATCGTTGGGCGAGTTGATGAAATAAAGGAGATTATTGAAGTATTCAAAGGTAGCCAACAACCTTGAGAAGATC  
TCAAGTGTGGGAAATGGTGGTATTGGGAAAACCCTCTAATTTCAAATGTCTACCGAAGCGAAAAGGTTAAGAAGATGTTGATAAGCATGCATGTGCAGCATGCGCCGTTCAATC  
TTAATGATCTTCTATGAGCTTAGTTAGGCAACTAGAAGATTTAAAACTTCTGGAGGAAAGGAGTTGGTAGCATTTTAGAAGGAAAGAAATACTTGTATTCTTGTGATGATATTATT  
CACAAACAGATGGGATGCTATAGAATCATATTTCCAGCAACGGAACAGGAAGCGGATCATAATAACCAAGGCATGAAAGTATTGCTAAGCATTGTTTCAAGGGATCAACAAGGCAAA  
ATGATCAACTCAATCGTCTAGGAGACAACGATGCAAAAGAACCTCTTTGCAAAGAAGGTAACCTTAAAGCATATATACTTCTCTCCATTGCTACGACATTACTACTGCTACTTAGTCTAG  
CTAGCTACCTTTGGAAAGCGAAACGGCTACCTATGAATCCAAACATAAATCATTGAACTTCTACATAGAGATAATGAAGTATTGTTGATTTAATTATCGTTCATTACACAAAATCAG  
AAAGGTCATGTGATATACTATGGGTGATGGAGTTACTACACCCCTCAACTAGATGATGCTTTCTTTGCAATAAATAAAGTATGCTTAGATACATGCAATGAAACCTCAAAATATGTT  
AAATATCAATATATGAAAATGATATTGATAAACTTATGATGAAAATGCTTTAATATAGTTATATTTCAATTTTATAAACATATAATAGAATTGATGAACATATGCCTTAAAGACTGTA  
TCAGTGTCCAAAATGTCATGTAAGAGAAATCCATATGTACACAATATAACCAAGGAAATAGAGAAAGAAATAAGAAAACCATATTGAAGCAACGCTTGAATGCAGGAATTTGAGAGTA  
TTCATAATATAACTAATCACAGTTCAGTGAACAGGAAACATCCGCAAAATTTAAACAGGCCATTATATTTTACAGTTACAGGAAGTATTATTTTAGCCGCTTAGCATAAGATGGAGGG  
GGAAAACAGTTGGTAGCCAATAGCTAGCAGCAATTAACCTCAGGGTTTTGAGGTAGCCTTACAGCCATTGATAGCAGTAGACTCATACTTAGGCTTCTGGGTTATGATCCCATCCT  
ATAATAATAAATCCATGGTGTCTATTTGAAAATAAAATTTCAATTCACGGATCTTCACTCTATTTACATTTAACAAAAAAAACATCATTACTGCGTAAAAACAAATGACCTACCCT  
CTTCCAGAGTTTGCACCTATGTAAGCAATTAGTGGGTTGTTGATGATCAATGCCCAAGCAAGACTTCAATCCTTTTGTACAGATAAAGTACGCTCCCTCTTTCAAATGTCTGTT  
GCAAACAGGCACTTGTATCCATCTGATTATATCTTTGCCATTGAAACCTCTTACCATCAGACACATGTGTAGTTAGTGAGCCGTTGCGAGCAGAAACAAGGCCAGCTATGCATGCTACC  
AACAAACAATAATTTGTTACCATATGCTATTCATATGTAACAATCACTGTACCTTTTTTCTAAAAAAAACATAAAGTGAATTAGAATATAGATCGATTTTATTGCTGAAGTTTCAC  
TTTGAATAGGTAATTTGCATTTGTGCAATTTTCGACCACCCCAAAACCATTTTTCAGCACATCGGCTCTAGCGTGTGATGAACATCTGAACAGTGTGCTAAACCATATCTTAAATA  
GAGGAGTGATTGGACATGGCTGAAGAGGGAAAGTTGAGGTGGTTTAAAGTGCAAAAAAGAAATGTAAGTAATCCAAAGTTAAAAGATCAGTCTGGTTCAAAGTAAAACCTTTCGCAATAAAGA  
TGATCCAAATTTGAATCACTCAATATGTTATAAATACAAAAAATAATCCATATATCTAATTTGCATTACATCCTAAATAAAGCATGAAACTTTTATTATTTCCGGTCAACCATTT  
AAAAACTATTGGTGGTGTATTTAAAAAGTAAAGCTTACAATTTGCAAGTATTGCGCACATAGTGTAGTATCTTATTATATATATATATATAAACCCTAACACACACACACAAC  
CCCTACAAATGTAATAATGCTAGATCTTTTATTACATACCAACATCACAATCATATGTACACAACCGTACGTACGTACTTACAGATAAATAACAGACATACAGGTTCTCATCAGAGG

**Supplementary Fig. S1** Genomic sequences containing the ORF regions of *BPH26*.

- (a) The genomic sequence of ADR52. The ORF region of *BPH26* is shown in red-color font.
- (b) The genomic sequence of Nipponbare. The ORF region of *BPH26* is shown in red-color font. The blue border indicates Os12g0559600 and the yellow border indicates Os12g0559400. Both Os12g0559600 and Os12g0559400 are putative genes. Both putative genes partially overlapped with the ORF of *BPH26*.

TATGTGGTGTGGTAGAGTTGTGCATGAATGCATAAECTACCCATTAGGATCAAAATCATAGTGTTCACAAATATTACATACATGGGTAGTGGAGTTTAGTGATGTTAGATACCACTGGCTT  
CTATCTCTCTTTAAGCGTGTGTTAAGAGAGTGTACTTGCCTGCCGCATATGCTTAATGTGCATCGAGTCTTCAGTGTAATAGAGAAAAAATAAAAAAAGCAATTTACAAAGAAA  
ATAAATAGGGAATCAAACCCAGATCCAATCGTAGCAACTGTATCATATTAECTCCTTTATATTAGAATCAACAATTACATTAGTCATAAATGGTAGCTAATCTTATTGTAGCATAATA  
TTTTGAATCAAACCCAGGATAGGCTTTGCCGGAACATATTTTGAACATGTATAATACATAACCCAAATTAACAACAGATAAAGGACGATGCACCTTTATTCATGTTTTAAACTTTGTA  
TGCTTAAACTTCAATAGTAGAGTTAAAGAAAACCCACTTGGGGTGGGGTGGGGTGTGGGGGCGAGCAAGTGGTTGGTGTAAAGTCGTGGTCCCATGATTCTACCTTGCCAATT  
CACATGTTTCTCACTAGATGTACAACCGTTGCTTCAGAGGTTTTGGGATTTTTGTTGTTCTTTGTTATTTATTGTTGTTGATTGCACGATGCGTGAGGATTGGATCATGATCCATGT  
GGTTCAGCGCACCAAGCCTTTTGCAGTGGGTTGAACTTGAACCTGGGACTTACTATTTGAGTGGAAAAAATTCAAAATTTGTAACATAAACTCTCTATGCAGCTTTAAAA  
TATTTATTTTTATTTTGTCTTGTGTTGAAATAAATATAATTTAAAAATTAACCAAAATTTGAAACTTTATGCAAAATGTAGAATTTGTACTGAAAATTTAAAACTCTAAAAAC  
AAATCAAACCTCAACTCAAATAACAATTTGCTCAGATTTAAGGCTTCTACCCAACTTTATAACTTTCAACTCAAATTTGAAATTTCAAGTCAAATTTGTAACCTTCAAGTCA  
AATATTCAAACCTACATACCCAAAAAACTATATAAAAAATGATACTCTGAACTCAAATTTCAAACTTTGTAACATAATTTATTTATCATATAGTACAGAAAGTTAGTATCAATGA  
GAAAGTTCAGATGATCAATTAGATGAAAAAAAACCTAGATTAAGCTTGTGCCGGGACGATAGCGCATGGTGCAGATGTGTACTTACCTCTATACAGTACGTATATTAGCAAAC  
ACCTACCTACCAAGGTAATCATGTTATGTATGGTGTGCATGCTAGTGGTGTGCATGCTCTATGCAATTGAAAAAAGAGACAATATTTTTCTAATTTCTCAAATCAAGATGTACATCG  
GTAATTAAGTCAACAATATGTTGAGAAAAATCAATCGTAGCCAAACCTCTGCTGTTGATTTATCACCTAAATTAACAATACAGACATTTTTAACTTGAACCTTACAACCGAAGC  
AATTAACCCCAAGTTGGTTAGAAATTTGGTCTTACGTGGCGCATGGCCCAACAAGTCAGTCTCCACCTCATCTCTCTATCAGGCTATTGGGGTCCACCTATCAGCTGCTAT  
CTCCTTTCTCAGCTAGAACACAAGCAGTCAATGCTCAGGCACTGCCGTGGACGTGCTAGCCTCTCCCTCTCGTACCAGAGAAAGCAACTCCACCCGCTCTCTATTCCAGATTGG  
ATCTAGACGCTCCCTCCACCACCGATTTGGACTGCTCCGCTACGCTCTCTCTCTCTCTTCCACCGCTGATTAGATCGTCACTGCTCTCTGCTCAGGCGCCGCGATGTGGCAGGC  
AGCGCAAAAGGGGCGGGGACGCTGTGGCAGCACCCTTCTTCCCATCTACAGCAAAAGCATTTCAGAGGACGAGCTCCACACACATGGTCAACACCGGGGTTCTCTGCTCCCTCGC  
CACCCCATCGAATGCCGAACTGTTGCTCCCATATGGCCCTACGACTCCATGGCTCAACGCGGGGACAGTGAACCTCACGGCAGAGTGGGACATGTGGCTTCAAACCTCACAGTGGAAAG  
TGGTAAGATCAACGGCGAGTCCACAACCTCAGCACCCTGCTCTCCACTATCTAGTCCGCGCGCTCACTTCTCTGACCTCAATTCTGCTCTCTCTGTTAGTCCGCTGCCTGCTGT  
CACCCCAAAATCTCAGCGCTGCTGTCTGGCTTGGCTTCCAGTGCCTGCTGGTGGAGATGGTATCGGCTATAGTAACCGAGATCGAGCGGGAGAGAGGATGGGGAGAAGAGACGGAT  
TGGGCTGACAAATGGTCCCATCTTTCTATTGTTTGGCTGAATAGAGTGGCCACATGTGCTACAGAGGATCAAAACAGCCTTGGATAGAGTTGGGGGGGGAGGGTAAAGTGT  
CCGGTTGTAAAGTTCAGGGTTAAAAATCTTTGTATTGTAATTTAGGTGGGGTGGGGTAAATTAATCGAACGGATGCAAAAAGTTAGGGGTAATTCAGACTTTTTCTTTATTTGG  
CTACACCCGACAAAGAACACATAAGTATATGTTGTGAGTGTGTGAGGGAGGCATGCATCAGTAATATGTCAAATAAACTTTATGCAAACTGGCAAAATAGTTCTACTATGAAAGCAAT  
AAGTCTCATATGAGCTGAGCCCCCCCCCAACCAACCATACAATAGCTAGTGAATCCTCATATATATATTGCCAGCTCGAACTGGCCTGCTGCGTTTGGGAACCAA  
CAATGAAATGGACCGAGTATATATGTTGAGCAGTACTATCACATAGGCTAGCTCCAGTGTGCTGACCGTCAACCCACTTCTTGTATGGCTTTTTGTGCGAGCAGTATTCTCGAGG  
CAGTCAAGCATCTAGTTGGCCATCCAATGCCATGCCACAACCTTGGCATTGCCGTTGCCGCTGGACCGACTAGATTTGATGGTCCCGGGCCGGCTCATGGCAACCGGATTCATT  
CTGATCATGCTCCATTGCCCTCACCCTCACCATAGCCCTACTATGCATTAGGCTGCCAGATATAACCCCTCTGTTCTGGTCTCTTCTCCATCACCCTCCTGCTGCTGCTCAGGT  
ATGGAGGGAGAGCGGATGGGATCCTCTGACGTGAAGTCAGAGGGATGTGGTACTGACATGTGGGCCCACTGCTCAGGGCCACCTGTGAGTACACGTCACGTGGTATTGCATC  
AGAGGAGCGCTTCAGAGGGAGAGCAGCGCGCGCTGCTCGAGATAGAGATGTAGACCAAGAACGAGAGGTTGATCGAGAGACTTAGCATGCTAGTTCATTGGACGTCCTATAGCCGTTT  
AGCTTGGCTTCTGCTGCTTTCTCATGAAATGGTGTGAGGGTGAAGATAAGCTGGCAATATATAGTGTCACTTTCCGGTTTATAAGAAAAACTGAAAAAAGAGCGGTATAGTG  
ATACTTCTGCTACCGGTTTTTCTCATGAACTGATTAAATATATGTTATTTAAGCATCGGTTTTAGGTTAATCAGCAGCGATTGCGCTGGTTCAGATTGATGTTCTATACTAGTCCAG  
TTACTCCGATAAATATTGCAAGAATTTATTTATGCACAATTAATTAATAAATAAAGTATTACTACTTAAATATACACATTCAGGATTTAAGGAGTCAGTAAATTTGGATCAACA  
AGATCTGAAATGATCAAAGAAGCGAACCGATTCTAAAGAAGTGAATGGACTTCCCTCGCAATTTGCACCATAGTGGTTTCTTGGCAAGCCGCCCAAACTACTTTGGAGTGGAGA  
AAATGAAATGAGCATATTAGTGCAGAGTGGAGACAAACCCAGGGCTTGGGGCATCAGAGCTGCTTAAATAAGCTACGATGGATTACCTTACACCTCAAGTCTGCTTCTGTATC  
TGTCCATCTTCTGAAGATGACAAGATTAGCGGAAACGTTTGGTCTCCGATGGTGTGCAGAGGGTACTCAAGGGAGCTATGGGATAAATCTGCAGAGGAAATAGCAAACTACTT  
CTTTGAACTCATAGACAGAAGCATGATCTACCAACTCAAATAACTTACAGCAATAGAGGAGCTGATCTTGGCAGGTCACGATATCATGCGGAGATAGCCATCTCGAAGTCAAAG  
GAGGAAAATCTTGTCTTAGACTCGAAGGGGTCGTAGGCTACACAATCATGACATAGTTCGACATCTTCCATTACAACAGCAGCGAGGACTGGGAGACAGATGTGGTGAATTAAGA  
CAACAGTAGACATGTCGGAATAAGATCATTAAACAGTGTGGGGAGTGGAGCCAAATTTTCTTCTGACAAGATGAGGTTGTTGCGTGTCTGACTTGGAGACACAGAAAGTGTACG  
TAATCACCATATTAAGCAAAGGGAGCTTCTTACCCTTAGATACCTTCTCTAAGAGGATGTACGCACATGCTTACATGCTGATCTTTGGTAACCTAAGGCACTGGAGACACTA  
GATGTGAGAGATACGTTCACTCAGGTGCCAAAGACCATCACTAATCTTTGCAAGCTGAAGTATCTCCGTGCAAGTAAAGACCTCAACTTCTATGAAGGCATAAGAGAGAACTACCAG  
AGCTCATGAGGAACAGGCTATGCATTTTACCCTGCTGTTGCTGGGGCTTTGCTGGCATGCTCAGCTAGTGCATTTGGTAAGTTGATGAAGAGATTAATACCCGTGATGTGCACCAT  
GTGTTGCTGCAGTATTCTCCCTAGCATTGCTATGCGCTCCAAGGGAATGGTGTAGTAGCACAAGAGGGCTGAGGATCAGGAGACTGACAGCCTGCACACGCTAGGTTGGTGGACATT  
TCATGGCAGCCATCAATTTACAAGATATCAAGAGGCTCATCCAGCTGCGCAAAATGGAAGTGAACCGGTGTCAACAAGAAAAATAGCAAAAAGCTTTTCTCTGCCCTTCCGCTCTCAGCC  
AACTAGAATCATTGTCACTGTTCTCGAAGTGGAAAGCCAGGCTCTGGGGCTGTCTGGATGCTGAAGAAAAAGTTTTCCGCCACCTAAGAAATCTCAAGACTCTGAAGCTTCAAGGCAACCTGGT  
TGAGCTGCCAAAATGGATCGGAAGCTCAACAATCTTTAAGCTGAAGCTATCAAAATCCAGGCTCAAGGATCATGCTGCTATACAAGTCTTGGTATGCTACCAAACTGACCATC  
CTATGCTGCCGCGAAGTATTCTACTCGCTTGGGGTGGCAACTCAATTTCTCGAAAGGATCTTCAAAGCCTGTTGGTTCTCGAGCTTACTTCAAGTGGAGCAAAAGGTTACGT  
TTCAACAAGGAGCATCCGCAACTAGAGCTGTTATTGCTTTCAGTTCATAGTGAAGAAGTCAAAGTAAATATCTGGACTAGAATTTCTCAAAGCATCAAGGAAGTTCAGATCGATGG  
TTATTGCCCAACGAGGAAGGATTGAAGAAAGACTTGGTCCAACCTTCTCAAATCCAAAGAAACCCCTTCTGAAGATCGACGGTATTTTTAA

Supplementary Fig. S1 a Continued.

**b**

ATGGAGGCCACGGCGGTGAGCATTGGCAGGTCCGTGCTGAAGGGAGCTCTTGCCCTGCCAAAATCCACCTTGGTGGAGGAGGTTTCCTCGAGCTCGCCGTCACGACGGCCGTTCA  
 TCAGGGACGAGCTGGAGATGATGAACTCCTCTCCTGATGGCCGCAATGATGAGAAAGATGACAAACAGGTGGTAAAGACCTGGGTGAAGCAGGTCCGCGACGTGGCTACGACGTCGAGGA  
 CTGCCTCCAGGACTTGGCCGTCGCTTGGGGAGGAAGATTATCCTGGTGGCTCAGCCCTCACACGCTGTGGAGCGGGCCGATCGCCAAAGCAGATGAAGGAGCTGAGGGCAAGGTT  
 GAGGATGTGAGCCAGAGAACATCGTACCAACTCATCAAGGGCTCCAAGCCTACCCTAGCTACCAATGTCGCACCCAGCAGCACTGCCCGTCGACCAATGCTGGCGTGCATGAAGAAC  
 GGTGGCAGCATGACAAGGACGTAGCTGGTCTGGTCTGATCAAAAACAAAAGTGCATGAACTTAGAGTGATTGCGGTGTGGGAACGAGTGGTGATACAGGGAAATGCCATCGT  
 TGGAGGGCCCTATGATCATCTCAAGGAAAGCAAAAGTTAGTGTGCTGCTGGGTTAATTTGATGCATCCTCTGAACCAACAAAAGCTCGTCAAAACCATTGTTAGCAATCTATGTA  
 AGATCTCTCAGGAGGCTGGCAAAGCACTCCGTCGTCGATCAAAATTTCTGAGTACGATGCTGATAAAGGAAGATCATTGAAACGATGAGTCAATGAATATTTAGTGACAAGCTACCTCG  
 TTAGTCTTAATGACCTATCAACCCTGAAGAAAGGAAACAAAAATGCTCTTCCAGACAAACAAGGAAGGAGCCGAATCATAGTGTTCACACAACATGTTGAAGTTGCAAGCTTTTG  
 TGCTAGGACCGAGGAGTGGACCCGAGCAATGCAGCTGTTGTGATCAGACTCTTTATGCTTTTTGCTGTAAAGGTAAGTACTCCATCCGTCCAAAATGATCATCATATAGTTTTTTAGG  
 TTAGTCTAAAATAATCATATTTATATTCATTCAATATGTATATTGTTTATGTTTCATTTGGAGTAAATGGATATTGATGCATGTATCAGTGCACACAAGTATTTATAACCCACATGCA  
 ATATCTGTATTGCTATTGGCTAGGAAATAGTGGAAATGGTCATGCATCGAGTTGTTGCTAGAGTAAATATAGTATGAGAGAGTATTTAGCTTTCTTGATATTGGTGTACCTATGAAT  
 ATGTAGATCAATTTAGAAATGGAGGAAGTAACTAAAAAAAATCCTCAAACATGCATGAAAAAGAAATATCTATATATCATCCGTTGAAAGCCTACTCTTTTTCATTCAACTGTGC  
 TGCTAAATAATCAATGTTTATCTATGTCAATATGTAACAAAAGAACTAACACTGATTAATAGTACGACATAGCTGTCTCTTTCATCTAAGAACTCCACGAAACATATATCAT  
 ATTGCTATAGTATAAATCAACAATTCTCTTTAAAAAATAACAGCTCCAAATAAATGCCCTACTCAATTTTAGTACTCCCATAGTGTGATAATCGACCCAAATTTTGGGTGCCCC  
 TGTCACACTCCCTATGCCAGCAAAGCTTGTGATGCCAGGGGGGAAACCACCCATTAGTAGGGTGGGGGCCGAGCCGCTATGGCCCGCCGCGCCCACTCCCATATCCTCTT  
 GGGCCGCTACCCACACATCCAAATTCACAATTTGGCCATAAAAAAGCAGCCAAAGTCCAATTCAGATTTCTGGGAAATCAAGAGTAACTCATGCCGAGTGCCTCGGTACCTAGC  
 GGCATCATCTCGCATGCTGCCTGCTCCTACCCACACGCGACACCTCGCTACCAGCAGTACGCGCTCGCTGCTACCTCGGTAACTCCAGCATTCGCGCGCCACCTCCCATATCCTCTT  
 CGCCGACACCATTCGCTCCTCTCTCGTGGGCGCCACAGCCAACTCGACACATTACCTGGCCCTCGCCCGCTTAGCATCGCCCATCGGGCATCCTGAGAAATGCTCACCCCATCACACTATAGT  
 ATCGGCAGCAGCAGCACCGCCGCAACAGCCAGTAGCCGAGTGTGCGGGCTTTAGCATCGCCCATCGGGCATCCTGAGAAATGCTCACCCCATCACACTACTATAGTTAGGT  
 GCTAAGCTTTTTCTCTCCTCCTCTAAAGCAAATAAATAATCATCTTATTGGGGTATGCTTCTCTCATATATTTTTTTTTAAAGATATCTACTCAACTGCTTTATGAATGACTCA  
 TATTGCAAATGATACGTTTACCAATATCTTTTTATGTATGATGAAATATTTTGGCAGCAAAATATTACTTTATATAAATATCGTTTTGTTTTGTTTTGTTTTGTTTTGTTTATAATATAT  
 GTTTATGTGATTACAACTAAATATAGTATTGTCATTGTTGTTCTATTGACAGGAGCTTTCGCCCTATCTTTAATTTAATCCTCGCTCCGCTCCGACATGTGATCGCTATCATT  
 CACTGCATCCTTACCCTCCTCCTCCACATCCTCATCTGCTGCGCTTTCGCTCCTGCGACCACACTTAGCTGGCATTGCTCTTTGCCCATCAAGCTCAACTCTGTTGAA  
 AGCATATTTTTATTTGATGTTGAAACGGCACTCCATCTTAACTTACTGCTTTAAAGCCCAACAATTTGTAAGTATATAAGCCAAATGCCGCTTATAGGCATACTATACTAAGACTG  
 TGATTAATTTGCTTGATTTAGTATTGCAATACGGTAATACTTTGAGCTCAACTTTAACTTACTACATAACACATTTTTAGAGGTTTTGAAAGTCAAAAATGTTAGATAGGTGCA  
 TTTGCATCTAGTAAATTTCCAAAGGATACTGATTATATGTACTATATCAGAAATCCACCAAAATTTACAGATTGATAAATCTTTAATTTAGTTGGCAAGTAAATATAGAGTAACA  
 CTTATGGTGGGGGACATTTAAAAATTAAGTAGTCAATTGAGATTGCTTTTTACTAACGAATGGTAACCTATTTATACATCTACAAGAGATTTGCTTGGGAAACAACATAAGTATAT  
 CATAGGAAATAGACAAATAGACATCATCATCTAAATTTCTAAATAAATAACTGTTCTCAAGAGGTTGGCTACATTTTTTTGCTGTTGTTTCATTGAAAAGTCTTGCACACTTTTTTC  
 CATTAAAGGGCATGACGATTTCTTTTTAACTCTCGTCTGCTTAATAATAAATGTCACACTATCATGCTGTTTAAAGAAAATAATGTTGATAAATTTTTTTTTTTTGGTGTGCA  
 GGGTCTAAAGATGGAGTAGATTCAATGGAGGACTCATCTAACTTAAACGAAGCACTACATACAACGCTGTAGAAGGAAAGAGCCCTCCTCGCACATATTCAATGGTAACTGCTTTCAAG  
 GAACTCGAGTCTGTGGGCGAGTTGATGAAATAAAGGAGATTATTGAAGTATTTCAAAGGTTAGCCAAACAGCTGAGAAAGTCTCAGTGTGGGGAAATGGTGGTATTGGGAAAAACCCTC  
 TAATCAAAATGCTTACCGAAGCGAAAGGTTAAGAGATGTTGATAGCATGCATGTGCAGCATCATGCGCCGCTTCAATCTTAATGATCTTCTATGAGCTTAGTTAGGCACTAGA  
 AGATTCAAAACTCTGGAGAAAGGAGTTGGCTAGCATTTTAGAAGGAAAGAAATACTGATTGTTGTTGATGTATTATCCACAACAAGTAAATGATAAGATAAGATCATATTTCCCA  
 GCAATGAAACAGGAGCGGATCATATAACCAAGGCATGAAAGTATGCTAAGCATTGTTAGGGGATCAACAAGGAAATAATACTCAACTCACTCGTCTAGGAGACAGCGTGCAA  
 AGAACCTTTTGCAAAAAGGTAACTTAAAGCATATATACTTCTCCTATTGCTACGCACTACTACTTCTAAAAGCATAATAAGCATGAACTTTTTATTTATTTTCGCTTAAACCAT  
 TTAAGAACTATTGGTGGTAAATATAAAGAGTATTACAATTTGCAAGTATTGCAATCTTATTTTTACTCCCTCCGTTATTTAATGTACGACGTGGTGGCTTTCGACCACGGTTT  
 GACCATTGTTTTATTCAAATTTTTTGCAAAATAAGAAACTTATAACCATGCTTAAAGAACATTTGATGACGAATCAAGTACAGTAAAATAAGTATAACATAAAATTTTTGAA  
 TAAGACAAACGGTCAAAAGTGGACAAAAAGTCAACGTTGGTCAACGTTTGAATAGGAACCTAGGTCATTTGACCTCCAATCTGACCGTTGAAATGCTGAGATGTGCTAGC  
 AAATGCTCTTTCTCCTCAAAATCATAGTTATTAAGGAAGGAAGGGACATGAATAACATAAAGGTACTGTGTTTTCTGCCACCCTTTTTAGCCCTTCCAAGTTTGCCCTGACATGG  
 TTCCATTCATTTTTTTCTAATGCATATAAAATTAAGGATGCCAAATTTTTGCCCCATATAACTATATGACGTTTAGACCTTTCCCTAGTACAATGATTTTTGTTAATAAGAACTGTCA  
 TACGTTGATATATCTGCAATGAGCTTCAAAACAGACATTCAAAAACAATTAAGCCACCTATCAGATTAGATAACACTGTAGAAAAGAGCGAAATAAGAAATAGCCAAATATCTCCCA  
 TAAGAAAGAACAACATGAAATATAAATATAATTGTTGTCATATACAATAAGCTTATGTTACATATCCATTTGTAGAAAAAATAATTTCTCATTATTTGCGTACAAAATGACGTCACAGAT  
 CATATCTTAACTTATATATCACTACTGACACTTGAAGAAAAACCCCTCAATCCTCAAAGAGGACACTATAAAATGATTTCCATCACTAAAATGACATTTACAAAATGGTGCATCTA  
 CTATATCTCATTTTGACATTGACTTAATGGAACATCTCCATTACAAAGGGCATGTTGACGAAAAACAATAAACTTGAAGAAATGACACTACATATACAGACAACATATATTTAAATA  
 ACATTTGAGAGCTTGATGAATCTCAAATGACTAGCAAAATAATGATGTATCTGTAAACGAAATTTGCTAATGATATATTGTTAATGATATACCGATATCTATGTTAATGAAAC  
 CTTGCTAGTGACTCAACTTTAACTGATATATTTACAACAATAATATCGGAAAGTATATGTCATCTGCAAAAATACATATGCAATGAAAGTGGTACAAAATAAATTTCTCTAATTGA  
 CATTGAGAGCCAAAAATAACTAGGTGATCAAGAAATTTATTAATTTGTAATGCACATACATGCAATTTTTTCCATGGAGAGGGGAGTACTAGTTGGAGGGCATCTTTGGGAAA  
 GCTACAGTAGAAAACGTAACAAACATGATCCTATTGAACCCACCAATGCACAGCCCTATATAGCAACTCCTAGATAGGTACATTTTGTATGGTGGTAGCAAAACATGATGGATCAAACT  
 GCATCGAGTCATATGCACAGCTGTGACCGAGGGATGAGGTGCATATGCACCGCGCATATTTTCCAGCTCACACACATATATATATATATATATATATATATATATATATATATAT  
 ATATGATGTATATATATATATATATATATATATATATATATATATATATATATATATATATATATATATATATATATATATATATATATATATATATATATATATATATATAT  
 TATATGATGTACGTACGACGTCGTTAGTCTCTAGTTTCTAACCCCTACAAATGACTACTCCTTATTGCAAAACCAACATCAAAACATTGTACACAACCAATACGATACAT  
 ACTTACACACAAAATACAGACATACAGGCTCACACCAGAGGTACGTGGTGGGGTAGAGTGTGAATGTATAAAGTAACTCAATCATAGTATTTCAAAATATACACATATGGGTAGTGGTGCA  
 CTTTTAGGAGTTAAATACCCTGGCCCTATCTCTCTTAAGCTTGTGTAAAGGAGTACTGTGACGCGCGCTGTCTTAATGCTGCTGGATCTCAGTGAATAGAAAAAAAAG

AGCAATTTACAATGGAAAGAAATAGGGAATTAACCCAGATCCCAATCATAGCAACTGTATCATATTAACACTTTATATAGAATTAACAATTTATGGTCATAAATGGTTAGCTAAT  
CTTATTGTAGCATAAATTTTGAATCTAGCCAGGATAGGCTATGCCGGAACATATATTTGAAACTATGTATAATACACATAATCCAAATTAACAACAGAAAAAGAGGATACACTTCAT  
TTTTTTTTTAAACTTGTATGCTTAACTACAGTAGAGTTAAACAAACACCACCTTGGGGGTGGTGGGGTGGTGGGGGACCACAAGTGGTTCGGTGTAAAGTCGTGGTCCCATG  
ATTCTACCTTGGCACACGTTCTTCACTAGATGTACAACCGTTGCTTACAGGTTCTGGGATTTTGTGTTCTCGTTATTTTATTGTTGTTGATTGCACGAAGCATGAGAAGTGGAT  
CATGATCCATGTGGTCTGGGCGACCTTAGGCCTTTGCAAGTGGTGTAAAGTTGGTACTTACTATTGAGTGGAAAAAGAAAAATCAAAATTTGTTGACCTAAAACTCTCTATGCAGCTT  
TAAAAATTTAATTTATTTTCTTGAAGTTGAAATAAATTAATTTAAATTTAACCAAAATTTGAAACTTTATGCAAAATGAGAATCTGCTATAGAAAAATTTAAAAAATCTAAA  
AAAAATCAAAACATCAACTCAAAATAACAAACTTCTCAGATTTTAAGGCTTCTACCCAAACTTTATAACTTTCAACTCAAAATCTGAAATTTTCAAGTCAAAATTTGTAACCTTTGAAG  
TCATATATCAAAACTACATACCCATAAAAACTATATGAAAAATATGATACTGAACTCAAAATCAAAACTTTGTAACCTCAAAATTTATTTATATATAGTACAGAAAGTATGATCAA  
TGAGAAAGTTGAGCAATCAATTTGATGAGAAAAACTAGACGAAACTTGTGCCGGGCGACTAAGCCATGGTGCAGATGTACTTACCTCCTATACAGTACGCGTATTAGCAACA  
CCTACCACCAAGGTAATCATAGTATGATGGTGCATGCCTAGTGTGCACGCTGTGCAGGGTACGGATAAGGCATACCTCACTACGACTTATGGAATATACCGATAAGGT  
ATACCTTACGATATAGGATGCTTCTGCAAAATCGTACAAAAACGCCCAAATTAAGAAAAATCTCCACAGTCAAGTATTCTAAAGTCTACAGGAGGGGATAGAAATTCGG  
TTATGCGTATCAGATCACAATCCTCAGACTTTCTTGGGGTCAACATGATCCACGGTAAAAAGGGACCCCTGGGAGGGGATCAGGCATCAATTTTCAAGTCAACACACCCCAAA  
AGTTTACGAAGATGGATACGCGAGCCAAAGTGCAGGAGATCCTCGAATCTTGCACGATCTTGTGGTATCGCCTATTGCACTACTCTCTTGTAAATTTGCTTGTATCA  
TCAATCCATATAAAGTGAAGTGGGCTTACCTGATAAGAGGCTGAAGTATGATCCTTGTCTTTGTCTGCTTGTGTCGATGTCGATATTACGTAGACCCCTGTTCAACGTAACCCAAATA  
CTCTACTTATCCGGTCCGTGAGTATCACTGTGCAACAGCTTCTTATGTAATGAAAAAAGGACAAATTTTTCTAATCTCAATCAAGATGTTATACGGTAAATTAAGTCAACAAT  
ATGTTGAGAAAAATCAGTGTAGCCAAACCTCCTGCTGCTGATTTACCCCTAAATACAAATACCTGACATTTTTAACTTGAACATTAACAACAGATGAATTAACCCCAAAGTTG  
GTTGATGTTGGTTTTGGTCTAGTGGGATACAGCCCAAGTCAAGTCTCCACTCATCCTCCTCCTATCAGGCTATTGGGATCCACTATCAGCTGCTATCTCCTTTCTTCACTAG  
AACACAAGAGCAGTCAATGCTTAGGCACTGCTTGGACGCCGTAGGCTGCTCCCTTCTCACCAGAAAGGCCAACTCCACCCTCTCTATCTAGACGGATCTAGATGCTCCTCCA  
CCACCAATTTGAGCTCTGCCGTACGCCCTCCTCCTCTTCTTCCGTCGCTAATAGATGCTCACTACCTCTCTGCTCCGGCCCGCTGATGTGGGAGGCAAGCACAAAAAGGGTGCAG  
GTAGCTGTGGCAGCACCCTTCTCCCATCTACAGCCAAAGCATTTCAGCAACAGAGCTCCACACACATGGTCAACACCGAGGTTCCCTGCTCCCTCCGCCACCCATCGAAGCCCG  
AACCTGTTGCTCCGTATGACACCTACGACCCCATGGCTCAACGCCGCGACGGTGAAGTATGGCAGAGGTTGGATGGTGGCTTCAAACTCACAATGGAAGTGGTGAAGTCAACGGCGA  
GATCCACAACCTCAACACCGCTGCATCCACTATCTGTGACGGTGCCTCACTTCTGACCTCAGTTTTGCTCCTCTGTTAGTCCACTGCCTGTCACCCATAATCTCAGCG  
CTGCTTCTTGGCTTGGCTTGGTCCGTCGATGCTGGGAGATGGTCAACGCCGAGTACGTCAGATCGAGCGAAAGAGAGGATGGGAGAAAGAGAGGACTGGGTCACAATGGGTC  
CCATCATTCTTTATTTGTTTGGCTAAATAGAGCTGCCACATGTTGGCAGATAGGATCAAAACTACCTTGGGTAAGTCCATTTTTTAAAGTTCAGGGTTAAAAAATGTTTGGTAT  
TGTAATTTAGTGGGGTGGGGTAAATCGAACGGACGATAGGGTAATTCAGACTTTTCTTTATTTGGCTACACCAGCAAGGAAACACATAAGTATGCTGTGAGTGCCTGAGG  
GAGGCATGTATCAGTATGTGCAATATAGTCTACTATGAAGCAATATGTTCTACTATAGGCTGACCTGCTGATACATACATCTGTATGCTTACAACACTACTATGAGTATGAG  
TTGTACCACCCCCCACTCGGAAAAATCTTACCATCACACTAGCTAGTGCAAATCCTCATATATATATTGCCAGCTGAAATCTGGCACTACTGTGCGTTGGGAACAGCA  
ATATTGAAATGGACTCAGTATATACTCCATATGTTGAGCAGTACTACTTGTAGAGTGAATAATTTTTTTTTAAAAAATCAACACATAGGCTAGCTCCAGTATGCCAACCG  
TCACCACCTTCTTATGACTTTTTGTGCGAGCAGTACTCCTCGAGCAGTCAAGCATTGCTTAGAGTGGTAAAGTCTGGCCCTATCCACCTCCCATCTAATGCTCATGCCACAACCC  
TTGCCATGCCGTTGCCGTGCTGGACCGCTAGATTTGATGGTCTGGGCTGGCTCAGGCAACCCGATCATTCTATGACCAATCATGCTTCCATTTCCCTCACTGTCACTAGTAG  
CCCTAGTCCCTACTATGCAATAAGGCCAGCCAGATATAGCCCTCCTGTGCTGCCCTCATTGTGCTCAGGATGGAGGGAGAGCAGTGGCGCATCTCGAGATAAAGGGAGATGTTGA  
CCAAGAGTGAAGTTGATTGAGAACTTAGCATGCTAGTTCATTTGGATGTCTCATAGCCATTGAGCTTGGCTTCCGCTGCTGCTTCTCTCGTGAACCGTGTGAGGGTGAAGATAA  
AGTTGGCAATATAGTGTCACTTCCGGTTTATAAGAAAAACTGAAAAAAACGGTATAGTGACTTCTGCTACCTGTTTTCTCATGAATGATCAATGCTATATTGAGCATCGGTT  
TTAGGTTAATCAGCTGCATTGCAGTGGTTGGATTGATGTTTCTACACTAGTCCAGTACTCCGATAAATATTGCAAGAAATTTTTATGCACAATAATAAAAAAGAGATTTA  
CTACTTAAATATACAGCTTCAAGTATTAAAGGAGTCAAGTAAATTTGGATCAAGAGATCTTGGTATTGAAAGAAACAAACTGATTCTAAGAGTGCAAAGGACTCCCTCGCAA  
TTGTCACCATAGGTTGTTCTGGCAAGCCGCCAAACTGCTTTGGAGTGGAGAAATTAATGAGCATAATAGTGCAGAGTTGGAGACAACTAGAGCTTGGGGCATAAAGAGCTGT  
CCTTAATAAAGCTACGATGGATACCCTATCACCTCAAGTCTTCTTGTACCTGCTCCTTCCCTCAAGATGACAAGATTAGCCGAAAGCTTTGGTGCAGGATGGTGCAGAG  
GGTACTCAAGGGAGCTATTGGACAACTGCATAGGAAATAGCAAACTACTTCTTGAAGTATAGACAGAATCATGCTCCTCAACTCAAAATCAACTTATAGCAGTAGAGGAG  
CTGATCTTGTAGGTTACGATATCATGCGAGATAGCCATCTCGAAGTCAAGGAGGAAATCTTGTCTTACTAGACTCGAAGGGGTCGTAGGCTACACAATCATGACAGTTCGGCA  
TCTTCCATTACAACAGCAGCGAGGACTGGGAGACAGATGTGGTGAATTAAGACAACAGTAGACATGCCGAAATAAGATCAATTAACAGTGTGGGGAGTGAAGGCCATTTTTCATT  
TCTGACAAGATGAGGTTGTTGCGTGTGCTGACTTGAAGACACAAAAGTGTACGTAATCACCATAATTAAGCAAAATAGGGAGCTTCTTCACTTATAGTACTTCTTCAAGAGGATGTA  
TGCAGATTGCTTACCTGCCTGATTCTTGGTAACTAAGGCAACTGGAGACTAGATGTGAGAGTACGTTACTACTCAGGTTGCCAAGACCATCACTAATCTTCCGAAAGTAAAGTA  
TCTCCGTGCAATTTAGACAAAATCACCTATGAAGAAATAGCAGAGGAACTACCAGAGGTCATGAGGAACTGCTATGCATTTTACCCTGCGTGTGTTGCTTGTGCTGGCATGCACA  
ACAAGTCAATTTGATGCTGGATGATGAGATTAATACCCGTGAGATGTGCTCCTGTTTTGCTGAGATTCTCCCTAGCATTGCTATGCGCTCCAAAGGAAATGGTGTAGTAGCACAA  
GAGGGCTGAGGAGACTGACAGCCCTGCACAGCTAGGTGTGGTGGACATCTCATGGGAATCATCAGTTTTACAGGATCTCAAGAACTCACTAGCTGCGCAAAATGGAAGTACCCGTGT  
CAACAAGAAAAACAGCAAAAGTTTTTTCTGTCTTGGCGCTCAGCCCTAGAAATCATTTGCTGCTCTCGAAGGAAAGCCAGGCTCTCGGGCTGTAGATGCTCAAGAAAAG  
TTTTACCACCTAAGGATGTCAAGAGCCTGAAGCTGCAAGGCAACCTGGTTGAGTTGCCAAATGGATCAAGCAGCTCAACAATCTGTTGAGGTTGAAAGTCACTAAAGG  
ATCATGATGCTGCTATACAAGCTTGGTATGCTACCAACCTGACCCTCATGCTGTCGCTGAGTGGTTCACTCGCTGAGGGTGAAGAACTCAATTTCTCGAGGGATCTTTCAA  
AAGCCTGGTGGTCTCGAGCTCAACTCAGTGGGAGCAATGTGTCAAGTTTGAACAAGGAGCGTCTCCTCAATCTTGGAGTACTGCTGTTTCACTTACTATGAAGAGTTGAAACTAAG  
TTCTCTGGGCTAGAATTTCTCAAGAGCTCAAGGAGTCCAGATCGATGTTTATGCCAAATAGGAAAGGATTGAAGAAAGACTTGTGGTCCAGCTTCTCAGAAATCAAGAAACCCT  
TTCTGAAGACTGGCCGTAATTTTTAA

Supplementary Fig. S1 b Continued.

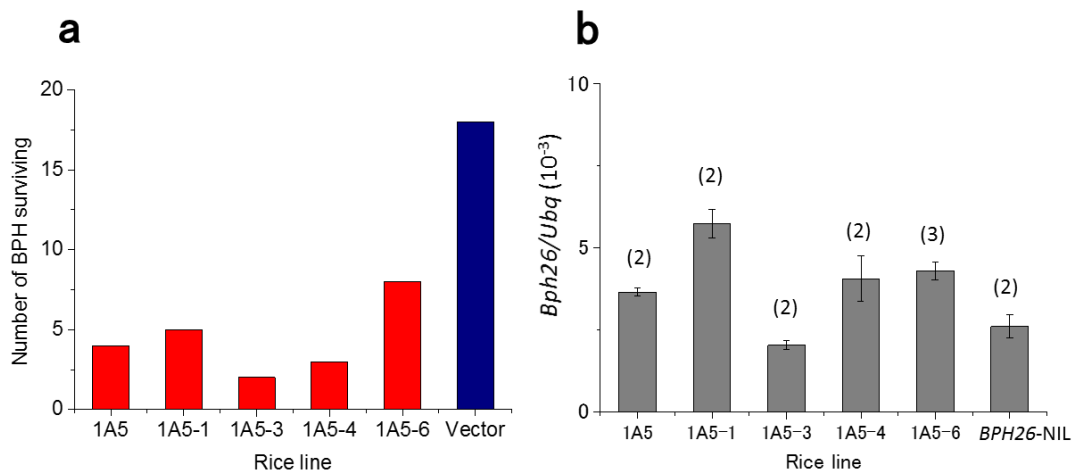

**Supplementary Fig. S2** Functional complementation test of transgenic plants ( $T_1$ ) that harbored the genomic region (1A5 fragment) of the candidate gene.

(a) Evaluation of resistance. The five 1A5 lines are the transgenic lines ( $T_1$ ) carrying the candidate gene on the DNA fragment 1A5 in the background of Taichung 65. The vector line is the transgenic plant ( $T_1$ ) with only the vector fragment in the background of Taichung 65.  $T_1$  plants that harbored fragment 1A5 were selected by PCR and used in the assays. The two brown planthopper (BPH) individuals at the last instar larval stage that had been fasted for 24 h were released in a test tube containing a  $T_1$  plant aged 13 days after germination, and the number of live BPH were recorded 5 days after their release. The tests were repeated 10 times (the total number of BPH was 20), and the total number of live BPH was summed accordingly.

(b) Expression levels of transformed *Bph26* mRNA. Relative mRNA levels were determined by real-time quantitative RT-PCR. The average values and standard deviation (s.d.) were calculated from three PCR measurements derived from one  $T_1$  plant. The number in parentheses at the top of each bar graph show the copy number of transformed *Bph26* determined by real-time quantitative RT-PCR.

|                                                                  |      |
|------------------------------------------------------------------|------|
| atccatccatcacacaagttactagcaatccacgagagagaacgccgaggagaggagagcaaa  | 60   |
| agccatggaggccacggcggtgagcattggcagggtccgtgctgaagggagcggcttggcctt  | 120  |
| cgccaaatccaccttgggtggaggagggtttccctgcagctcggcgctccagcgtgaccaggc  | 180  |
| gttcatcaggacgagctggagatgatgaactccttcctgatggccgccaatgatgagaa      | 240  |
| agatgacaacaaggtggtaaggacctgggtgaagcagggtccgcgacgtggccctacgacgt   | 300  |
| tgaggactgcctccaggacttcgccgtccgcttggggggggaagagttcaacctgggtggct   | 360  |
| cagccctcacacgctgtgggagcggcgccgcatcgccaagcagatgaaggagctgaggggg    | 420  |
| caaggttgaggatgtcagccagaggaacatgcgctatcaactcatcaagggctccaagcc     | 480  |
| tactgtagctaccaatgtcacacccagcagcactgccgtgcgaccatgtctggcgcgca      | 540  |
| tgaagaacgggtggcagcatgagaaggcaatagatcatctgggttcggctggtcaaaaccaa   | 600  |
| agtcgatgaacgtagagtgatcgcggtgtggggaaacaagttggtgatatacagggaaatgtc  | 660  |
| catcttgaggagggcctatgatcatctcaagagaaacaacaagtttgagtgctatgcctg     | 720  |
| ggttaatttgatgcatcctctgaacccaacaaagctcctgcaaacattgttaggcaatt      | 780  |
| ctatgtaagatctcttcaggaggctggcaaaagcaactccgctcgtgtcaaatcttgagtag   | 840  |
| catgttgataaaggaagatcaggggtttgggggttaggggtctgaggagcatgctgatgaa    | 900  |
| ggaagatcatttgaatgatgagttcaataaataatttgagtgacaagtgctacctcattgt    | 960  |
| gcttaatgacctatcgaccgctgaagagtggaaagc aaattaaaatgctcttcccagacaa   | 1020 |
| caagaaaggaagccgaatcatagtggtcacacaacaagttgaagttgcaagcttttgcgc     | 1080 |
| taggacagaggagggtggcaccggagcacatgacagttgtttgctgatcagactctttatgc   | 1140 |
| tttccactcaccctctaattcaaaatgtctacaggaagcggataaataaccacaagcttaaa   | 1200 |
| cgaagacactacatacaacgctgtagaaggaaagagcctcactcgcacataattcaatggt    | 1260 |
| aactgctttcaaggaatctgagatcgttggcgagttgatgaaataaaggagattattga      | 1320 |
| actgatttcaaaaggtagccaacaacttgagaaagatctcagttggtgggaaatgggtggtat  | 1380 |
| tgggaaaaccactctaattcaaaatgtctacaggaagcggataaataaccacaagcttaaa    | 1440 |
| taagcatgcatgtgtcagcatatgccccgttcaatcttaatgatcttcttatgagctt       | 1500 |
| agttaggcaactagaagattcaaaaacttctggaggaaaggagttggttagcattttaga     | 1560 |
| aggaaagaaatacttgattgttcttgatgatgtattattcaacaacagaatgggatgctat    | 1620 |
| agaatcatatttcccagcaacaggaaacaggaaagccggatcataataaccacaagcattga   | 1680 |
| aagtattgctaagcattgttcaggggatcaacaaggcaaaatgtatcaactcaatcgtct     | 1740 |
| aggagacaacgatgcaaaagaacctctttgcaaaaggaaggtatttaaggagtcagtaaaatt  | 1800 |
| ggatcaacaagatcttgaattgatcaaaagaagcgaaccgattctaaagaagtgcaatgg     | 1860 |
| acttcccctcgcaattgtcaccataggtgggttctctggcaagccgccccaaaactacttt    | 1920 |
| ggagtggagaaaaattgaaatgagcattatagtgacagagttggagacaaacccagggcttga  | 1980 |
| ggccatcagagctgtccttaataataagctacgatggattaccttatcaccctcaagctctg   | 2040 |
| cttcttgatctgtccatcttctcctgaagatgacaagattagccggaaacggtttgggtgct   | 2100 |
| ccgatggtgtgtaggggttactcaaggagcctatgggataaatactgtagaggaataatgc    | 2160 |
| aaacaactacttctttgaaactcatagacagaagcattgatcctaccactcaaaaaatcaac   | 2220 |
| ttacagcaatagaggagctgattcttggcaggctccacgatatacatgcccagagatagccat  | 2280 |
| ctcgaagtc aaaggaggaaatcttgttcttagactcgaagggggtcgtaggctacacaa     | 2340 |
| tcattgacataagttcagacatctttccattcaaaacagcagcaggagactgggagacatgt   | 2400 |
| cggtgaattgaagacaacagtagacatgtcccgaataagatcattaacagtggtttggggga   | 2460 |
| gtggaggccaattttcatttctgacaagatgagggttgttgcgctgtgctcgcacttgggaaga | 2520 |
| cacagaagggtgtacgtaatcaccatattaaagcaaataggggagcttcttacccttagata   | 2580 |
| cttctcctaaagagatgtacgcacattgtctcaacagcctgattcttgggtaacctaaag     | 2640 |
| gcaactggagacactagatgtcagagatacgttcaactcagggttgccaaagaccatcac     | 2700 |
| taatctttgcaagctgaagtatctccgctgcaagtaaaagaccctcaacttctatgaaggcat  | 2760 |
| aagagagaaactaccagagctcatgaggaaacaggctatgcatttttaccgctgctgtgct    | 2820 |
| ggggctttgtctggcattgctcagctagtgcgattggtaagtttgatgaagagattaatac    | 2880 |
| ccgtgatgtctgcaccatgtgttgcctgacgtattctcccctagcattgctatgctgcccctca | 2940 |
| agggaaatgggtgtagtagcacc aagagggtgaggatcaggagagactgacagccctgcacac | 3000 |
| gctaggtgtgggtggacatttcatggcagccatcaattttacaagatatacaagaggctcat   | 3060 |
| ccagctgcgcaaaattggaagtgcacgggtgtcaacaagaaaaatagcaaaaagctttctc    | 3120 |
| tgcccttgccgctctcagccaactagaatcattgtcactgttctcgaagtggaaagccagg    | 3180 |
| tctctggggctgtctggatgctgaagaaaagtttctgccaccctaagaatctcaagactct    | 3240 |
| gaagcttcaaggcaacctgggttgagctgcca aaatggatcgggaagctcaacaatcttgt   | 3300 |
| taagctgaagctatcaaaaatccaggctcaaggatcatgatgctgctatacaagctccttgg   | 3360 |
| tatgctaccaaaacctgaccatcctatgcctgcccgcgaagtcatttcaactcgtttagggg   | 3420 |
| tggcgaactcaatttctcggaaggatctttcaaaagcctgtttggttctcgagcttgactt    | 3480 |
| cagttgggagcaaaagggtgttacgtttcaacaaggagcattccgcaaaactagagctgttatt | 3540 |
| gcttccagttcatagtgaaagaagttcaagataaattatctggactagaatttctccaaag    | 3600 |
| catcaaggaagttcagatc gatggttattgccc aaacgaggaaggattgaagaaagactt   | 3660 |
| gctggtccaactttctcaaaaatccaaagaaaccttcttgaagatcgacgggttatttt      | 3720 |
| agctgactctgatgttggggctaatgttctcctctgtgctgcttgggttgttgtcaact      | 3780 |
| tctctctctctctctctctctctctctctctctctctctctctctctctctctctctct      | 3840 |
| tttggcgtttttatccaaactttactgaagcttctccttaatcatgtgtggtgctgctc      | 3900 |
| caaatgaagtgatcaggaaagctctactagtagtactgttagtgatgctagtgcataaat     | 3960 |
| aatatactccctccatattttaatgtatgacgctgttgactttttg                   | 4006 |

**Supplementary Fig. S3** cDNA sequence of *Bph26*. Bases painted yellow show initiation codon and stop codon in order.

|               |                                                                      |
|---------------|----------------------------------------------------------------------|
| ADR52         | MEATAVS IGRSVLKGALGFAKSTLVEEVSLQLGVQRDQAF IRDELEMMNSFLMAANDEKD       |
| ASD7          | MEATAVS IGRSVLKGALGFAKSTLVEEVSLQLGVQRDQAF IRDELEMMNSFLMAANDEKD       |
| Nor in-PL4    | MEATAVS IGRSVLKGALGFAKSTLVEEVSLQLGVQRDQAF IRDELEMMNSFLMAANDEKD       |
| IR1154-243    | MEATAVS IGRSVLKGALGFAKSTLVEEVSLQLGVQRDQAF IRDELEMMNSFLMAANDEKD       |
| Rathu Heenati | MEATAVS IGRSVLKGALGFAKSTLVEEVSLQLGVQRDQAF IRDELEMMNSFLMAANDEKD       |
| Babawee       | MEATAVS IGRSVLKGALGFAKSTLVEEVSLQLGVQRDQAF IRDELEMMNSFLMAANDEKD       |
| T65           | MEATAVS IGRSVLKGALGFAKSTLVEEVSLQLGVQRDQAF IRDELEMMNSFLMAANDEKD       |
| Nipponbare    | MEATAVS IGRSVLKGALGFAKSTLVEEVSLQLGVQRDQAF IRDELEMMNSFLMAANDEKD       |
| ADR52         | DNKVVRTVVKQVRDVAYDVEDCLQDFAVRLGGKSSTWWLSPHTLWERRR IAKQMKELRGK        |
| ASD7          | DNKVVRTVVKQVRDVAYDVEDCLQDFAVRLGGKSSTWWLSPHTLWERRR IAKQMKELRGK        |
| Nor in-PL4    | DNKVVRTVVKQVRDVAYDVEDCLQDFAVRLGGKSSTWWLSPHTLWERRR IAKQMKELRGK        |
| IR1154-243    | DNKVVRTVVKQVRDVAYDVEDCLQDFAVRLGGKSSTWWLSPHTLWERRR IAKQMKELRGK        |
| Rathu Heenati | DNKVVRTVVKQVRDVAYDVEDCLQDFAVRLGRKSSWWLSPHTLWERRR IAKQMEELRGK         |
| Babawee       | DNKVVRTVVKQVRDVAYDVEDCLQDFAVRLGRKSSWWLSPHTLWERRR IAKQMEELRGK         |
| T65           | DNKVVRTVVKQVRDVAYDVEDCLQDLAVRLGRKSSWWLSPHTLWERRR IAKQMKELRGK         |
| Nipponbare    | DNKVVRTVVKQVRDVAYDVEDCLQDLAVRLGRKSSWWLSPHTLWERRR IAKQMKELRGK         |
| ADR52         | VEDVSQRNMRYQL IKGSKPTVATNVTSPSTARATMSGAEERWQHEKA IDHLVRLV-KTK        |
| ASD7          | VEDVSQRNMRYQL IKGSKPTVATNVTSPSTARATMSGAEERWQHEKA IDHLVRLV-KTK        |
| Nor in-PL4    | VEDVSQRNMRYQL IKGSKPTVATNVTSPSTARATMSGAEERWQHEKA IDHLVRLV-KTK        |
| IR1154-243    | VEDVSQRNMRYQL IKGSKPTVATNVTSPSTARATMSGAEERWQHEKA IDHLVRLV-KTK        |
| Rathu Heenati | VEDVSQRNMRYQL IKGSKPTVATNVAPSSTARATMSGAEERWQHEKA IDHLVRLV-KTK        |
| Babawee       | VEDVSQRNMRYQL IKGSKPTVATNVAPSSTARATMSGAEERWQHEKA IDHLVRLV-KTK        |
| T65           | VEDVSQRNMRYQL IKGSKPTVATNVAPSSTARATMSGVHEERWQHDKAVAGL VRLV I KTK     |
| Nipponbare    | VEDVSQRNMRYQL IKGSKPTVATNVAPSSTARATMSGVHEERWQHDKAVAGL VRLV I KTK     |
| ADR52         | VDERRVI AVWGTSGD IREMS I VGGAYDHLKRNNKFECYAWVNLMHPLNPTKLLQT I VRQF   |
| ASD7          | VDERRVI AVWGTSGD IREMS I VGGAYDHLKRNNKFECYAWVNLMHPLNPTKLLQT I VRQF   |
| Nor in-PL4    | VDERRVI AVWGTSGD IREMS I VGGAYDHLKRNNKFECYAWVNLMHPLNPTKLLQT I VRQF   |
| IR1154-243    | VDERRVI AVWGTSGD IREMS I VGGAYDHLKRNNKFECYAWVNLMHPLNPTKLLQT I VRQF   |
| Rathu Heenati | VDERRVI AVWGTSGD IREMS I VGGAYDHLKRNNKFECYAWVNLMHPLNPTKLLQT I VRQF   |
| Babawee       | VDERRVI AVWGTSGD IREMS I VGGAYDHLKRNNKFECYAWVNLMHPLNPTKLLQT I VRQF   |
| T65           | VDELRV I AVWGTSGD IREMS I VGGAYDHLKRNNKFECYAWVNLMHPLNPTKLLQT I VRQF  |
| Nipponbare    | VDELRV I AVWGTSGD IREMS I VGGAYDHLKRNNKFECYAWVNLMHPLNPTKLLQT I VRQF  |
| ADR52         | YVRS LQEAGKATPSCQ I LSSML I KEDQGLGFRVLR SMLMKEDHLNDEFNKYLSDKCYL I V |
| ASD7          | YVRS LQEAGKATPSCQ I LSSML I KEDQGLGFRVLR SMLMKEDHLNDEFNKYLSDKCYL I V |
| Nor in-PL4    | YVRS LQEAGKATPSCQ I LSSML I KEDQGLGFRVLR SMLMKEDHLNDEFNKYLSDKCYL I V |
| IR1154-243    | YVRS LQEAGKATPSCQ I LSSML I KEDQGLGFRVLR SMLMKEDHLNDEFNKYLSDKCYL I V |
| Rathu Heenati | YVRS LQEAGKATPSCQ I LSSML I KEDQGLGFRVLR SMLMKEDHLNDEFNKYLSDKCYL I V |
| Babawee       | YVRS LQEAGKATPSCQ I LSSML I KEDQGLGFRVLR SMLMKEDHLNDEFNKYLSDKCYL I V |
| T65           | YVRS LQEAGKATPSCQ I L S-----SML I KEDHLNDEFN E YLSDKCYL VM           |
| Nipponbare    | YVRS LQEAGKATPSCQ I L S-----SML I KEDHLNDEFN E YLSDKCYL VM           |
| ADR52         | FHCKGAKDGVDSMEDSSNLNEDTTYNAVEGKSLTRTYSMVTAFKESE I VGRVDE I KE I I E  |
| ASD7          | FHCKGAKDGVDSMEDSSNLNEDTTYNAVEGKSLTRTYSMVTAFKESE I VGRVDE I KE I I E  |
| Nor in-PL4    | FHCKGAKDGVDSMEDSSNLNEDTTYNAVEGKSLTRTYSMVTAFKESE I VGRVDE I KE I I E  |
| IR1154-243    | FHCKGAKDGVDSMEDSSNLNEDTTYNAVEGKSLTRTYSMVTAFKESE I VGRVDE I KE I I E  |
| Rathu Heenati | FHCKGAKDGVDSMEDSSNLNEDTTYNAVEGKSLTRTYSMVTAFKESE I VGRVDE I KE I I E  |
| Babawee       | FHCKGAKDGVDSMEDSSNLNEDTTYNAVEGKSLTRTYSMVTAFKESE I VGRVDE I KE I I E  |
| T65           | FRCKGAKDGVDSMEDSSNLNEDTTYNAVEGKSLTRTYSMVTAFKESE I VGRVDE I KE I I E  |
| Nipponbare    | FRCKGAKDGVDSMEDSSNLNEDTTYNAVEGKSLTRTYSMVTAFKESE I VGRVDE I KE I I E  |

**Supplementary Fig. S4** Alignment of amino acid sequences of BPH26 in some rice varieties. The amino acid sequences of ADR52, ASD7, and Norin-PL4 were deduced from the cDNA sequences, and those of IR1154-243, Rathu Heenati, Babawee, Taichung65 (T65), and Nipponbare were deduced from its genomic sequences. The ORF sequences based on the genomic sequences of ADR52 and ASD7 have been confirmed to be the same as those of the cDNA sequences. A yellow border indicates that the amino acid sequence is the same as that of ADR52, and green and blue borders indicate that the sequence is different from that of ADR52. The repetitive amino acids in the deduced leucine-rich repeat (LRR) are shown in red-color font.



ADR52 LISKGSQQLEKISVWGMGGIGKTTLIQNVYRSEKVKKMFDKHACVTIMRPFNLNDLLMSL  
ASD7 LISKGSQQLEKISVWGMGGIGKTTLIQNVYRSEKVKKMFDKHACVTIMRPFNLNDLLMSL  
Nor in-PL4 LISKGSQQLEKISVWGMGGIGKTTLIQNVYRSEKVKKMFDKHACVTIMRPFNLNDLLMSL  
IR1154-243 LISKGSQQLEKISVWGMGGIGKTTLIQNVYRSEKVKKMFDKHACVTIMRPFNLNDLLMSL  
Rathu Heenati LISKGSQQLEKISVWGMGGIGKTTLIQNVYRSEKVKKMFDKHACVTIMRPFNLNDLLMSL  
Babawee LISKGSQQLEKISVWGMGGIGKTTLIQNVYRSEKVKKMFDKHACVTIMRPFNLNDLLMSL  
T65 LISKGSQQLEKISVWGMGGIGKTTLIQNVYRSEKVKKMFDKHACVTIMRPFNLNDLLMSL  
Nipponbare LISKGSQQLEKISVWGMGGIGKTTLIQNVYRSEKVKKMFDKHACVTIMRPFNLNDLLMSL

ADR52 VRQLEDKSTSGGKELVSILEGKKYLIVLDDVLFTEWDAIESYFPATETGSRIIITTRHE  
ASD7 VRQLEDKSTSGGKELVSILEGKKYLIVLDDVLFTEWDAIESYFPATETGSRIIITTRHE  
Nor in-PL4 VRQLEDKSTSGGKELVSILEGKKYLIVLDDVLFTEWDAIESYFPATETGSRIIITTRHE  
IR1154-243 VRQLEDKSTSGGKELVSILEGKKYLIVLDDVLFTEWDAIESYFPATETGSRIIITTRHE  
Rathu Heenati VRQLEDKSTSGGKELVSILEGKKYLIVLDDVLFTEWDAIESYFPATETGSRIIITTRHE  
Babawee VRQLEDKSTSGGKELVSILEGKKYLIVLDDVLFTEWDAIESYFPATETGSRIIITTRHE  
T65 VRQLEDKSTSGGKELVSILEGKKYLIVLDDVLFTEWDAIESYFPATETGSRIIITTRHE  
Nipponbare VRQLEDKSTSGGKELVSILEGKKYLIVLDDVLFTEWDAIESYFPATETGSRIIITTRHE

ADR52 SIAKHCSGDQQGKMYQLNRLGDNDAKNLF AKKVFKE SVNLDQQDLEL I KEAKP I LKKCNG  
ASD7 SIAKHCSGDQQGKMYQLNRLGDNDAKNLF AKKVFKE SVNLDQQDLEL I KEAKP I LKKCNG  
Nor in-PL4 SIAKHCSGDQQGKMYQLNRLGDNDAKNLF AKKVFKE SVNLDQQDLEL I KEAKP I LKKCNG  
IR1154-243 SIAKHCSGDQQGKMYQLNRLGDNDAKNLF AKKVFKE SVNLDQQDLEL I KEAKP I LKKCNG  
Rathu Heenati SIAKHCSGDQQGKMYQLNRLGDNDAKNLF AKKVFKE SVNLDQQDLEL I KEAKP I LKKCNG  
Babawee SIAKHCSGDQQGKMYQLNRLGDNDAKNLF AKKVFKE SVNLDQQDLEL I KEAKP I LKKCNG  
T65 SIAKHCSGDQQGKMYQLNRLGDNDAKNLF AKKVFKE SVNLDQQDLEL I KEAKP I LKKCNG  
Nipponbare SIAKHCSGDQQGKMYQLNRLGDNDAKNLF AKKVFKE SVNLDQQDLEL I KEAKP I LKKCNG

ADR52 LPLAIVTIGGFLASRPKTTLEWRKLNHISAELETNPGLA I RAVLN I SYDGLPYHLKSC  
ASD7 LPLAIVTIGGFLASRPKTTLEWRKLNHISAELETNPGLA I RAVLN I SYDGLPYHLKSC  
Nor in-PL4 LPLAIVTIGGFLASRPKTTLEWRKLNHISAELETNPGLA I RAVLN I SYDGLPYHLKSC  
IR1154-243 LPLAIVTIGGFLASRPKTTLEWRKLNHISAELETNPGLA I RAVLN I SYDGLPYHLKSC  
Rathu Heenati LPLAIVTIGGFLASRPKTTLEWRKLNHISAELETNPGLA I RAVLN I SYDGLPYHLKSC  
Babawee LPLAIVTIGGFLASRPKTTLEWRKLNHISAELETNPGLA I RAVLN I SYDGLPYHLKSC  
T65 LPLAIVTIGGFLASRPKTTLEWRKLNHISAELETNPGLA I RAVLN I SYDGLPYHLKSC  
Nipponbare LPLAIVTIGGFLASRPKTTLEWRKLNHISAELETNPGLA I RAVLN I SYDGLPYHLKSC

ADR52 FLYLSIFPEDDKISRKRLVLRWCAEGYSRELWDKSAEEIANNYFFELIDRSMI-LPTQKS  
ASD7 FLYLSIFPEDDKISRKRLVLRWCAEGYSRELWDKSAEEIANNYFFELIDRSMI-LPTQKS  
Nor in-PL4 FLYLSIFPEDDKISRKRLVLRWCAEGYSRELWDKSAEEIANNYFFELIDRSMI-LPTQKS  
IR1154-243 FLYLSIFPEDDKISRKRLVLRWCAEGYSRELWDKSAEEIANNYFFELIDRSMI-LPTQKS  
Rathu Heenati FLYLSIFPEDDKISRKRLVLRWCAEGYSRELWDKSAEEIANNYFFELIDRSMI-LPTQKS  
Babawee FLYLSIFPEDDKISRKRLVLRWCAEGYSRELWDKSAEEIANNYFFELIDRSMI-LPTQKS  
T65 FLYLSIFPEDDKISRKRLVLRWCAEGYSRELWDKSAEEIANNYFFELIDRSMI-LPTQKS  
Nipponbare FLYLSIFPEDDKISRKRLVLRWCAEGYSRELWDKSAEEIANNYFFELIDRSMI-LPTQKS

ADR52 TYSNRGADSCQVHDMREIAISKSKEENLVLREGGRRLHNHDI VRHLSITNSSEDWETD  
ASD7 TYSNRGADSCQVHDMREIAISKSKEENLVLREGGRRLHNHDI VRHLSITNSSEDWETD  
Nor in-PL4 TYSNRGADSCQVHDMREIAISKSKEENLVLREGGRRLHNHDI VRHLSITNSSEDWETD  
IR1154-243 TYSNRGADSCQVHDMREIAISKSKEENLVLREGGRRLHNHDI VRHLSITNSSEDWETD  
Rathu Heenati TYSNRGADSCQVHDMREIAISKSKEENLVLREGGRRLHNHDI VRHLSITNSSEDWETD  
Babawee TYSNRGADSCQVHDMREIAISKSKEENLVLREGGRRLHNHDI VRHLSITNSSEDWETD  
T65 TYSNRGADSCQVHDMREIAISKSKEENLVLREGGRRLHNHDI VRHLSITNSSEDWETD  
Nipponbare TYSNRGADSCQVHDMREIAISKSKEENLVLREGGRRLHNHDI VRHLSITNSSEDWETD

ADR52 VGELKTTVDMSRIRSLTVFGEWRPFI SDKMRLLRVLDLEDTEGVRNHHIKQIGELHLR  
ASD7 VGELKTTVDMSRIRSLTVFGEWRPFI SDKMRLLRVLDLEDTEGVRNHHIKQIGELHLR  
Nor in-PL4 VGELKTTVDMSRIRSLTVFGEWRPFI SDKMRLLRVLDLEDTEGVRNHHIKQIGELHLR  
IR1154-243 VGELKTTVDMSRIRSLTVFGEWRPFI SDKMRLLRVLDLEDTEGVRNHHIKQIGELHLR  
Rathu Heenati VGELKTTVDMSRIRSLTVFGEWRPFI SDKMRLLRVLDLEDTEGVRNHHIKQIGELHLR  
Babawee VGELKTTVDMSRIRSLTVFGEWRPFI SDKMRLLRVLDLEDTEGVRNHHIKQIGELHLR  
T65 VGELKTTVDMSRIRSLTVFGEWRPFI SDKMRLLRVLDLEDTEGVRNHHIKQIGELHLR  
Nipponbare VGELKTTVDMSRIRSLTVFGEWRPFI SDKMRLLRVLDLEDTEGVRNHHIKQIGELHLR

Supplementary Fig. S4 Continued.

ADR52 YLSLRGCTHIAYMPDSLGNLRQLETLDVRDTFILRLPKTI TNLCKLYLRASKDLNFYEG  
ASD7 YLSLRGCTHIAYMPDSLGNLRQLETLDVRDTFILRLPKTI TNLCKLYLRASKDLNFYEG  
Nor in-PL4 YLSLRGCTHIAYMPDSLGNLRQLETLDVRDTFILRLPKTI TNLCKLYLRASKDLNFYEG  
IR1154-243 YLSLRGCTHIAYMPDSLGNLRQLETLDVRDTFILRLPKTI TNLCKLYLRASKDLNFYEG  
Rathu Heenati YLSLRGCTDIAYLPDSLGNLRQLETLDVRDTFILRLPKTI TNLRKLYLRASIDLMIVEV  
Babawee YLSLRGCTDIAYLPDSLGNLRQLETLDVRDTFILRLPKTI TNLRKLYLRASIDLMIVEV  
T65  
Nipponbare -----

ADR52 IREKLPPELNRRLCIFTAALLGLCLACSASAIKGFDEEINTRDVCTMCCCSILPSIAMRL  
ASD7 IREKLPPELNRRLCIFTAALLGLCLACSASAIKGFDEEINTRDVCTMCCCSILPSIAMRL  
Nor in-PL4 IREKLPPELNRRLCIFTAALLGLCLACSASAIKGFDEEINTRDVCTMCCCSILPSIAMRL  
IR1154-243 IREKLPPELNRRLCIFTAALLGLCLACSASAIKGFDEEINTRDVCTMCCCSILPSIAMRL  
Rathu Heenati IIEKLPPELNRRLCIFTAALLFLCLACTTSSIGMLNGGINTRDVCTLGCCSFLPSIAMLL  
Babawee IIEKLPPELNRRLCIFTAALLFLCLACTTSSIGMLNGGINTRDVCTLGCCSFLPSIAMLL  
T65  
Nipponbare -----

ADR52 QGNGVVAPRGLRIRRLTALHTLGVVDISWQPSIQDIKRLIQLRKLEVTGVNKKNSKKLF  
ASD7 QGNGVVAPRGLRIRRLTALHTLGVVDISWQPSIQDIKRLIQLRKLEVTGVNKKNSKKLF  
Nor in-PL4 QGNGVVAPRGLRIRRLTALHTLGVVDISWQPSIQDIKRLIQLRKLEVTGVNKKNSKKLF  
IR1154-243 QGNGVVAPRGLRIRRLTALHTLGVVDISWQPSIQDIKRLIQLRKLEVTGVNKKNSKKLF  
Rathu Heenati DGSVVAPRGLRIRRLTALHTLGVVDISWESSIQDIIKRLIQLRKLEVTGVNKKNSKKFF  
Babawee DGSVVAPRGLRIRRLTALHTLGVVDISWESSIQDIIKRLIQLRKLEVTGVNKKNSKKFF  
T65  
Nipponbare -----

ADR52 SALAALSQLESLSLFSKWKPGLWGCLDAEEKFSPPKNLKTLLQGNLVELPKWIGKLNLL  
ASD7 SALAALSQLESLSLFSKWKPGLWGCLDAEEKFSPPKNLKTLLQGNLVELPKWIGKLNLL  
Nor in-PL4 SALAALSQLESLSLFSKWKPGLWGCLDAEEKFSPPKNLKTLLQGNLVELPKWIGKLNLL  
IR1154-243 SALAALSQLESLSLFSKWKPGLWGCLDAEEKFSPPKNLKTLLQGNLVELPKWIGKLNLL  
Rathu Heenati SALAALSRLLESLSLFSKWKPGLWGCLDAEEKFSPPKDLKSLKQGNLVELPKWIRQLNLL  
Babawee SALAALSRLLESLSLFSKWKPGLWGCLDAEEKFSPPKDLKSLKQGNLVELPKWIRQLNLL  
T65  
Nipponbare -----

ADR52 VKLKLKSKSRLKDHDAAIQVLMPLNLTILCLPRKSFHSLEGGELNFSEGSFKSLLVLELD  
ASD7 VKLKLKSKSRLKDHDAAIQVLMPLNLTILCLPRKSFHSLEGGELNFSEGSFKSLLVLELD  
Nor in-PL4 VKLKLKSKSRLKDHDAAIQVLMPLNLTILCLPRKSFHSLEGGELNFSEGSFKSLLVLELD  
IR1154-243 VKLKLKSKSRLKDHDAAIQVLMPLNLTILCLPRKSFHSLEGGELNFSEGSFKSLLVLELD  
Rathu Heenati VKLKLSETMLKDHDAAIQVLMPLNLTILCLSRFSFHSLEGGELNFSEGSFKSLVVLKLF  
Babawee VKLKLSETMLKDHDAAIQVLMPLNLTILCLSRFSFHSLEGGELNFSEGSFKSLVVLKLF  
T65  
Nipponbare -----

ADR52 FSGSKGVTFQQGAFRKELELLSVHSEEVQSKLSGLEFLQSIKEVQIDGYCPNEEGLKGD  
ASD7 FSGSKGVTFQQGAFRKELELLSVHSEEVQSKLSGLEFLQSIKEVQIDGYCPNEEGLKGD  
Nor in-PL4 FSGSKGVTFQQGAFRKELELLSVHSEEVQSKLSGLEFLQSIKEVQIDGYCPNEEGLKGD  
IR1154-243 FSGSKGVTFQQGAFRKELELLSVHSEEVQSKLSGLEFLQSIKEVQIDGYCPNEEGLKGD  
Rathu Heenati FGGSKCVKFQQGAFHDELELLSVYSEEVETKFSGLEFLQSIKEVQIDGYYPNWKGLKGD  
Babawee FGGSKCVKFQQGAFHDELELLSVYSEEVETKFSGLEFLQSIKEVQIDGYYPNWKGLKGD  
T65  
Nipponbare -----

ADR52 LLVQLSQNPKKPFLKIDGYF  
ASD7 LLVQLSQNPKKPFLKIDGYF  
Nor in-PL4 LLVQLSQNPKKPFLKIDGYF  
IR1154-243 LLVQLSQNPKKPFLKIDGYF  
Rathu Heenati LLVQLSQNPKKPFLKTGRNF  
Babawee LLVQLSQNPKKPFLKTGRNF  
T65  
Nipponbare -----

**Supplementary Fig. S4** Continued.

**P-loop**

BPH26 K I S V W G M G G I G K T T L I Q N V Y R  
 BPH14 V L P I V G M G G M G K T T L A Q L I Y N  
 PIB V I S V W G M G G L G K T T L V S G V Y Q

**RNBS-I**

BPH26 F D K H A C V T I M R P F N L N D L L M  
 BPH14 F Q L L L W V C V S D N F D V D L L A K  
 PIB F D K Y V F V T I M R P F I L V E L L R

**Kinase-2**

BPH26 K K Y L I V L D D V  
 BPH14 Q R Y L L V L D D V  
 PIB K S C L I V L D D F

**RNBS-II**

BPH26 G S R I I I T T R H E S I A K  
 BPH14 G S S V L T T T R D Q E V A Q  
 PIB T S R I I V T T R K E N I A N

**RNBS-III**

BPH26 Y Q L N R L G D N D A K N L F  
 BPH14 Y D L K R L K E S F I E E I I  
 PIB H N L K V L K H N D A L C L L

**GLPL**

BPH26 I L K K C N G L P L A I V T I  
 BPH14 I A K K C S G S P L A A T A L  
 PIB I L K K C D G L P L A I V V I

**RNBS-IV**

BPH26 P G L E A I R A V L N I S Y D G L P Y H L  
 BPH14 D E E N G I L P I L K L S Y N C L P S Y M  
 PIB P E L G M I R T V L E K S Y D G L P Y H L

**RNBS-V**

BPH26 K S C F L Y L S I F P E D D K I S R K R L V L R W C A E G Y S R E  
 BPH14 R Q C F S F C A I F P K D H E I D V E M L I Q L W M A N G F I P E  
 PIB K S C F L Y L S I F P E D Q I I S R R R L V H R W A A E G Y S T A

**RNBS-VI**

BPH26 A N N Y F F E L I D R S M I L  
 BPH14 G K R I F S E L V S R S F F Q  
 PIB A N G Y F M E L K N R S M I L

**MHDV**

BPH26 C Q V H D I M R E I A I S K S  
 BPH14 C K I H D L M H D V A Q S S M  
 PIB C K V H D L M R D I A I S K S

**NL17**

BPH26 E E N L V L R L E G G  
 BPH14 E G S F L I P K Y H H  
 PIB E E N L V F R V E E G

**Supplementary Fig. S5** Alignment of main motifs in CC-NBS domains of BPH26 in *O. sativa* cv. ADR52, BPH14 in *O. officinalis* and PIB in *O. sativa* cv. Engkatek.

### <BPH26 LRR>

-----IKQIGELHLRYLSLRGCTHIAY  
-----MPDSLGNLRQLLETLDVRDTFILR  
-----LPKTI TNLCYLKYL RASKDLNFYEGIREKLPELMRN  
-----RLCIFTAALLGLCLACSASAIGKFDEEINTRDVCTMCCCSILPSIAMRLQGNGVVAPRGLR  
-----IRRLTALHTLGVVDISWQPS  
-----ILQDIKRLIQLRKLEVTGVNKKNSKK  
-----LFSALAAALSQLESLSLFSKWKPGWGLDAE  
-----EKFSPPKNLKTLKQ  
GNLVELPKWIGKLNVLKLSKSRDKHDAA  
-----IQVLGMLPNLTI LCLPRKSFHSLEGGELN  
-----FSEGSFKSLLVLELDFSGSKG  
-----VTFQQGAFRKELELLSVHSEEVQS  
-----KLSGLEFLQS I KEVQIDGYCPNEEGLKDLLVQLSQNPKKPFLKIDGYF

### <BPH14 LRR>

-----LIPKYHHHLRYLDLSESEIKA  
-----LPEDISILYHLQTLNLSRCLSLRRLPKGMKYMALRHLYTHGCWSLGSMP  
-----PDLGHLTCLQTLTCFVAGTCSGC  
-----SDLGE LRQLDLGGRELRKLENTKADAKA  
-----ANLGKKEKLTCLTITWDQEYKEAQSNNHKEVL  
-----EGLTPHEGLKVLSTYHCGSSTCPTWMNKL RDMVGLLELNGC  
-KNLEKLPPLWQLPALQVLC  
-----EGLGSLNCLFNCDTHTPFTF  
-----CRLKELTLDMTNFETWWDTNEVQGEELMF  
-----PEVEKLSIESCHRALTALPKASNAISESSGEVSTVCRSAFPALKE  
-----MKLYDLRIFQKWEAVDGT  
-----PREEATFPQLDKLEIRQCELTTLPEAPKLSDEISKGNQQISLQAAS  
-----RHITSLSSLVHLSTDDTETASVAKQDSSDLVIEDEKWSHKSPLELMVLSRCNLLFSHPALALWTCFA  
-----LDLKI RYDALVSWPEE  
-----VFQGLVSLRKEISVCENLTGHTQARGQSTPAPS  
-----ELLPRLSELEITCCDSIVEVPN  
-----LPASLKLLEIRGCPGLESIVFNQQDRTMLVSAESFAEQDKSSLISGSTSETND  
-----HVLPRLESVINWCDRLE  
-----VLHLPSTKKGISYCEKLRSL  
-----LSVKLDAVRELSIRHCGSLKS  
-----LESCLELASLQQLKLFDCSLES LKPGPQAY  
-----SSLTSLEIRGCSGIKVLPSSLQQLDDIEDKELDACYEAEAEPKSRHRQSAISRLMCLK

### <PIB LRR>

-----GAI RHLA I SSNWKGDKSEF  
-----EGIVDL SRIRSLSLFGDWKPFV  
-----KMRFIRVLD FEGTRGLEYYH  
-----LDQIWKLNHLKFLSLRGCYRIDL  
-----LPDLLGNLRQLQMLDIRGTYVKA  
-----LPKTIKQLQYIHAGRKTDYVWEEKHSLMQRCKVGCICATCCLPLCEMYGPLHKALARRDAWTFACCVKFPSIMTGVEEEGA  
-MVPSGIRKLDLHTLRNINVGRGN  
-----AILRDI GMLTGLHKLGVAGINKKNGRAFR  
-----LAISNLNKLESLSVSSAGMPGLCGCLDDISSPP  
-----ENLQSLKLY  
GSLKTLPEWIKELQHLVKLKL VSTRLEHDVAM  
-----EFLGELPKVEILVISPFKSEEIHFKPPQTG  
-----TAFVSLRVLKL AGLWGIKS  
-----VKFEEGTMPKLERLQVQGR IENEIGF  
-----SGLEFLQNI NEVQLSVWFPTDHDRIRARAAGADYETAWEEVQEARRKGGELKRKIREQLARNPNQPIIT

**Supplementary Fig. S6** Amino acid sequences of the deduced leucine-rich repeat (LRR) of BPH26 in *O. sativa* cv. ADR52, BPH14 in *O. officinalis* and PIB in *O. sativa* cv. Engkatek. The repetitive amino acids in the LRR are shown in red-color font.

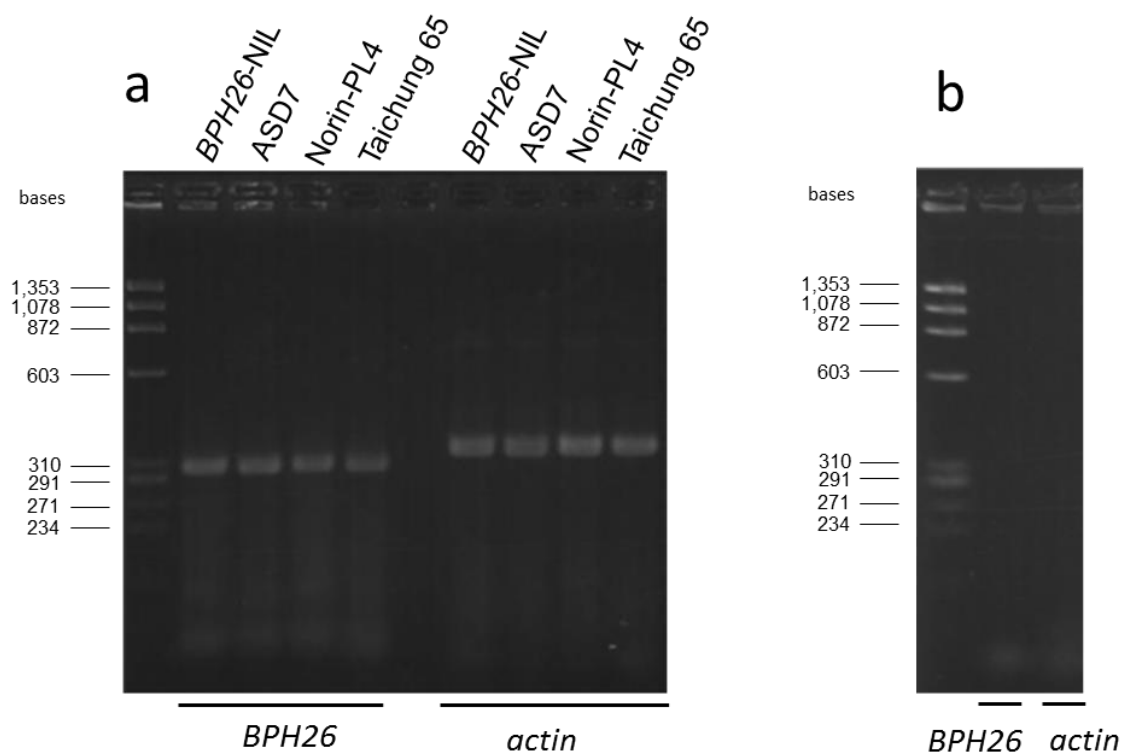

**Supplementary Fig. S7** Full-length gel of Figure 4a and that of negative control.

(a) Gene expression analysis of *BPH26* in some rice varieties by using reverse transcriptase (RT)-PCR. Actin primers were used in the control amplification.  $\phi$ X174 - *Hae* III digest was used as a molecular-weight size marker. Fragments sizes are marked on the left, in base pairs.

(b) Negative control of (a). One step RT-PCR was conducted without total RNA.

### Supplementary Table S1

Predicted genes by rice annotation project database in the candidate region of the *japonica* cultivar Nipponbare.

|   |              |                                               |
|---|--------------|-----------------------------------------------|
| 1 | Os12g0558366 | Similar to F-box domain-containing protein    |
| 2 | Os12g0558400 | Similar to F-box domain-containing protein    |
| 3 | Os12g0559000 | Hypothetical conserved gene                   |
| 4 | Os12g0559100 | Conserved hypothetical protein                |
| 5 | Os12g0559250 | Non-protein coding transcript                 |
| 6 | Os12g0559200 | Lipoxygenase (EC 1.13.11.12)                  |
| 7 | Os12g0559300 | Similar to leucine-rich repeat family protein |
| 8 | Os12g0559400 | Similar to leucine-rich repeat family protein |
| 9 | Os12g0559600 | Similar to resistance protein RGA2            |

## Supplementary Table S2

### PCR primers used in this study

| Primer name                                                           | Forward primer (5'-3')                                | Reverse primer (5'-3')    | Purpose       |
|-----------------------------------------------------------------------|-------------------------------------------------------|---------------------------|---------------|
| High-resolution mapping                                               |                                                       |                           |               |
| RM28449                                                               | CACCCATTGATGTGAAACTCTGG                               | GGATTCATGATACAGTGTGCAACG  | SSR marker    |
| RM3813                                                                | ACCGTTAGATGACACAAGCAACG                               | GGTTAGCAAGACTGGAGGAGACG   | SSR marker    |
| ID-28L4                                                               | GAAGGGAAATGGAAGCATGA                                  | TACACCCGACAAGGAACACA      | InDel marker  |
| ID-174                                                                | TGCTCGTACGATGGAGTCAT                                  | CGGGCTTCATTCATCGTTA       | InDel marker  |
| ID-161                                                                | CTGTCAAATTGCGTTCGAT                                   | CATCCCCTGAATTTGAAACA      | InDel marker  |
| ID-161-2                                                              | ATCCTTTTCGGACAGGGTGAT                                 | GGACGGGATGATACCTCAGA      | InDel marker  |
| DS-L74                                                                | AGCGGATGCTAAAAGCAAAA                                  | AATAGACGGGGCAAGGGTAG      | SNP marker    |
| DS-72B4                                                               | AAAGTGCGCAGCAGTACAGA                                  | GGATGCAGATCGAACACTGA      | SNP marker    |
| DS-173B                                                               | TCACGACGTTATTCATGTTTCA                                | TCCCATGCCAATCAATATCA      | SNP marker    |
| Comparison of alleles from some varieties                             |                                                       |                           |               |
| BPH26-Exson1                                                          | TAGCATCAGTCCCTTGCTTGTTC                               | ATTGATTTAATTAGCAGACAAGTTG | Sequencing    |
| BPH26-Exson2                                                          | AACTCTCGTCTCGTCTTAAAATATA                             | AGTAGTAATGTGCGTAGCAATGGAG | Sequencing    |
| BPH26-Exson3                                                          | CTAGTGCCAGTTACTCCGATAAATAT                            | TATGCACTAGCATCACTACA      | Sequencing    |
| Gene expression analysis                                              |                                                       |                           |               |
| BPH26-RT-PCR                                                          | GCTACCAAACCTGACCATCC                                  | AGCAAGTCTTTCTTCAATCCTT    | RT-PCR        |
| Actin-RT-PCR                                                          | TCCATCTTGGCATCTCT                                     | GTACCCGCATCAGGCATCTG      | RT-PCR        |
| <i>In situ</i> hybridization analysis                                 |                                                       |                           |               |
| BP26-insitu-AP                                                        | <u>ATTAACCCTCACTAAAGGGAA-</u><br>GGAAGTTCAGATCGATGGTT | TGGATAAAACGGCAAATTA       | Probe         |
| BP26-insitu-SP                                                        | <u>ATTAACCCTCACTAAAGGGAA-</u><br>TGGATAAAACGGCAAATTA  | GGAAGTTCAGATCGATGGTT      | Probe         |
| Confirmation of the insertion site in T <sub>1</sub> transgenic lines |                                                       |                           |               |
| pPZP2H-lac-D                                                          | ACTATCCTTCGCAAGACCCT                                  | GATCAGCAATCGCGCATATG      | Detection     |
| Real-time quantitate RT-PCR analysis                                  |                                                       |                           |               |
| BPH26-qPCR                                                            | CCAAACGAGGAAGGATTGAA                                  | AGCCCCAACATCAGAGTCAG      | Real-time PCR |
| UBQ-qPCR                                                              | GAGCCTCTGTTCGTCAGTA                                   | ACTCGATGGTCCATTAAACC      | Real-time PCR |

The *in situ* hybridization probe: T3 promoter sequence (underlined) was attached to the top sequence of the forward primer.

SSR, simple sequence repeat. InDel, insertion-deletion mutation. SNP, single nucleotide polymorphism. RT-PCR, reverse-transcription PCR.
